# Supplementary material
Source: PubMed Central journal article supplement (PMC2738631)
Supplement: NIHMS121380-supplement-1_si_001.pdf [file NIHMS121380-supplement-1_si_001.pdf]

**Supporting Information:**

**Proton Assisted Recoupling at High Spinning Frequencies**

Józef R. Lewandowski,<sup>†1</sup> Gaël De Paëpe,<sup>†2</sup> Matthew T. Eddy,<sup>†</sup> Jochem Struppe<sup>‡</sup>, Werner Maas<sup>‡</sup>

and

Robert G. Griffin<sup>†\*</sup>

*<sup>†</sup>Department of Chemistry and Francis Bitter Magnet Laboratory, Massachusetts Institute of Technology, Cambridge, Massachusetts 02139*

*and*

*<sup>‡</sup>Bruker BioSpin Corporation, Billerica, Massachusetts 01821*

**Corresponding author email:** rgg@mit.edu

---

<sup>1</sup> Current address: Université de Lyon, CNRS/ ENS Lyon/ UCB-Lyon 1, Centre RMN à Très Hauts Champs, 5 rue de la Doua, 69100 Villeurbanne, France

<sup>2</sup> Current address: Laboratoire de Chimie Inorganique et Biologique, UMR-E3 (CEA/UJF), CEA/DSM/INAC - 38054 Grenoble - France

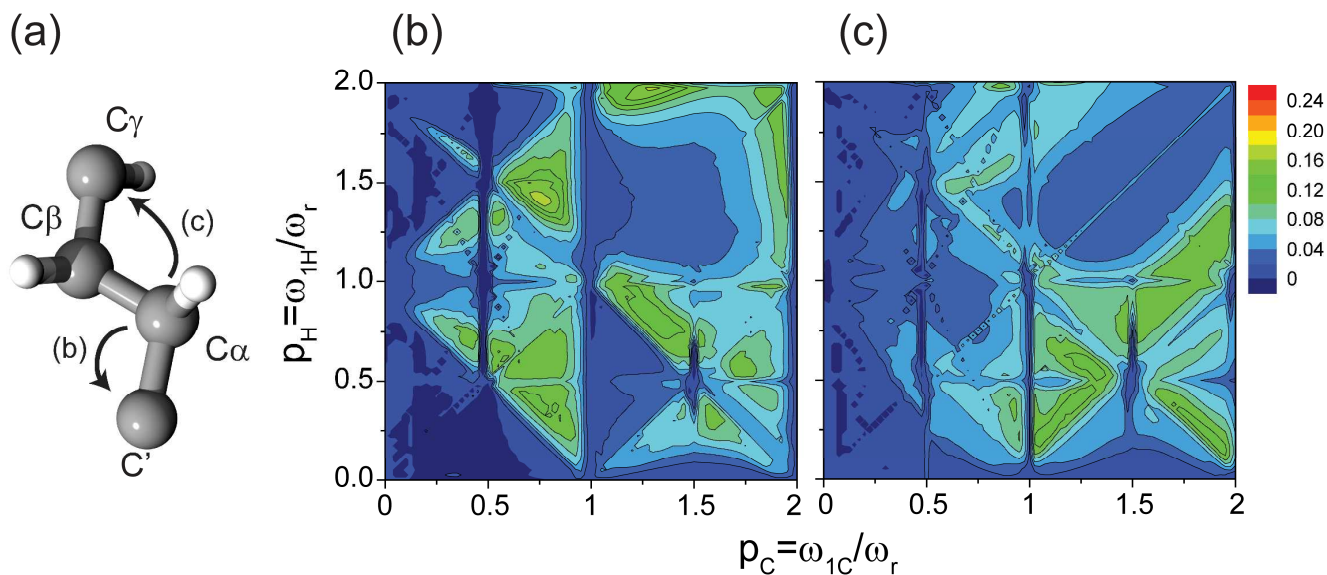

**Figure S11.** Numerical simulation of the  $^{13}\text{C}$ - $^{13}\text{C}$  PAR polarization transfer optimization map performed on the spin system shown in (a). The contour plots represent polarization transfer between the  $\text{C}_\alpha$  and  $\text{C}'$  in (b), and  $\text{C}_\alpha$  and  $\text{C}_\gamma$  in (c) as a function of  $^{13}\text{C}$  and  $^1\text{H}$  irradiation strength in units of spinning frequency. Simulations were performed using 5 ms PAR mixing time at  $\omega_r/2\pi=65$  kHz MAS and  $\omega_{0\text{H}}/2\pi=500$  MHz and include chemical shift. The details of the spin system are listed in Table S11.

| Atom | X      | Y      | Z     | $\delta_{\text{iso}}$ (ppm) | $\delta_{\text{anis}}$ (ppm) | $\eta$ |
|------|--------|--------|-------|-----------------------------|------------------------------|--------|
| LCA  | 0.297  | 0.449  | 0.95  | 41.2                        | 25.1                         | 0      |
| LC   | -0.263 | 1.661  | 0.227 | -77.2                       | -76                          | 0.99   |
| LCB  | 1.831  | 0.463  | 0.896 | 57.3                        | 23.8                         | 0.92   |
| LCG  | 2.514  | -0.743 | 1.538 | 73                          | -19.8                        | 0      |
| LHA  | -0.045 | 0.454  | 2.017 | 0                           | 5                            | 0.6    |
| LHB2 | 2.192  | 1.389  | 1.412 | 0                           | 5                            | 0.6    |
| LHG  | 2.235  | -1.667 | 0.969 | 0                           | 5                            | 0.6    |

**Table S11.** Spin system used in simulation in the Figure 2 in the main text and Figure S11. The coordinates were taken from the SSNMR structure of N-f-MLF-OH<sup>1</sup> (PDB ID 1Q7O). The CH bond lengths were set to 1.12 Å.

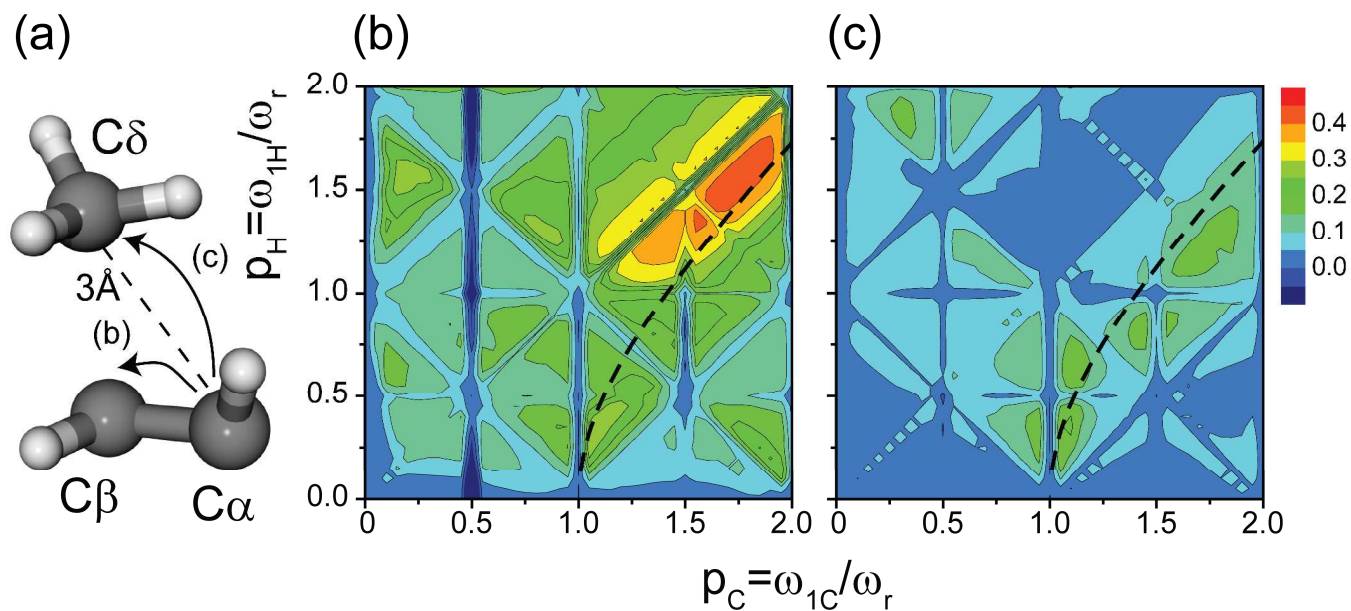

**Figure SI2.** Numerical simulations of the  $^{13}\text{C}$ - $^{13}\text{C}$  PAR optimization maps on the aliphatic region. (a) spin system used in simulation taken from the SSNMR structure of N-*f*-MLF-OH<sup>1</sup> (see Table SI2). The contour plots represent polarization transfer between the carbons (indicated by black arrow – C $\alpha$ -C $\beta$  in (b) and C $\alpha$ -C $\delta$  in (c)) as a function of  $^{13}\text{C}$  and  $^1\text{H}$  irradiation strength in units of spinning frequency. Simulations were performed using 5 ms PAR mixing time at  $\omega_r/2\pi=65$  kHz MAS and  $\omega_{0\text{H}}/2\pi=500$  MHz and include chemical shift. Simulation accounts for the threefold methyl group hop. For the settings indicated by the black dashed lines the CH auto-cross term is zero.

| Atom           | X      | Y      | Z     | $\delta_{\text{iso}}$ (ppm) | $\delta_{\text{anis}}$ (ppm) | $\eta$ |
|----------------|--------|--------|-------|-----------------------------|------------------------------|--------|
| LC $\alpha$    | 0.288  | 0.419  | 0.932 | -15                         | 25.1                         | 0      |
| LC $\beta$     | 1.822  | 0.433  | 0.878 | 10                          | 23.8                         | 0.92   |
| LC $\delta$ 2  | 2.051  | -0.907 | 2.978 | 17                          | -19.8                        | 0      |
| LH $\alpha$    | -0.054 | 0.425  | 1.999 | 0                           | 5                            | 0.6    |
| H $\beta$ 2    | 2.183  | 1.36   | 1.394 | 0                           | 5                            | 0.6    |
| L1H $\delta$ 2 | 2.149  | 0.071  | 3.515 | 0                           | 5                            | 0.6    |
| L2H $\delta$ 2 | 2.686  | -1.677 | 3.486 | 0                           | 5                            | 0.6    |
| L3H $\delta$ 2 | 0.981  | -1.236 | 2.988 | 0                           | 5                            | 0.6    |

**Table SI2.** Spin system used in simulation in the Figure SI2. The coordinates were taken from the SSNMR structure of N-*f*-MLF-OH<sup>1</sup> (PDB ID 1Q70). The CH bond lengths were set to 1.12 Å.

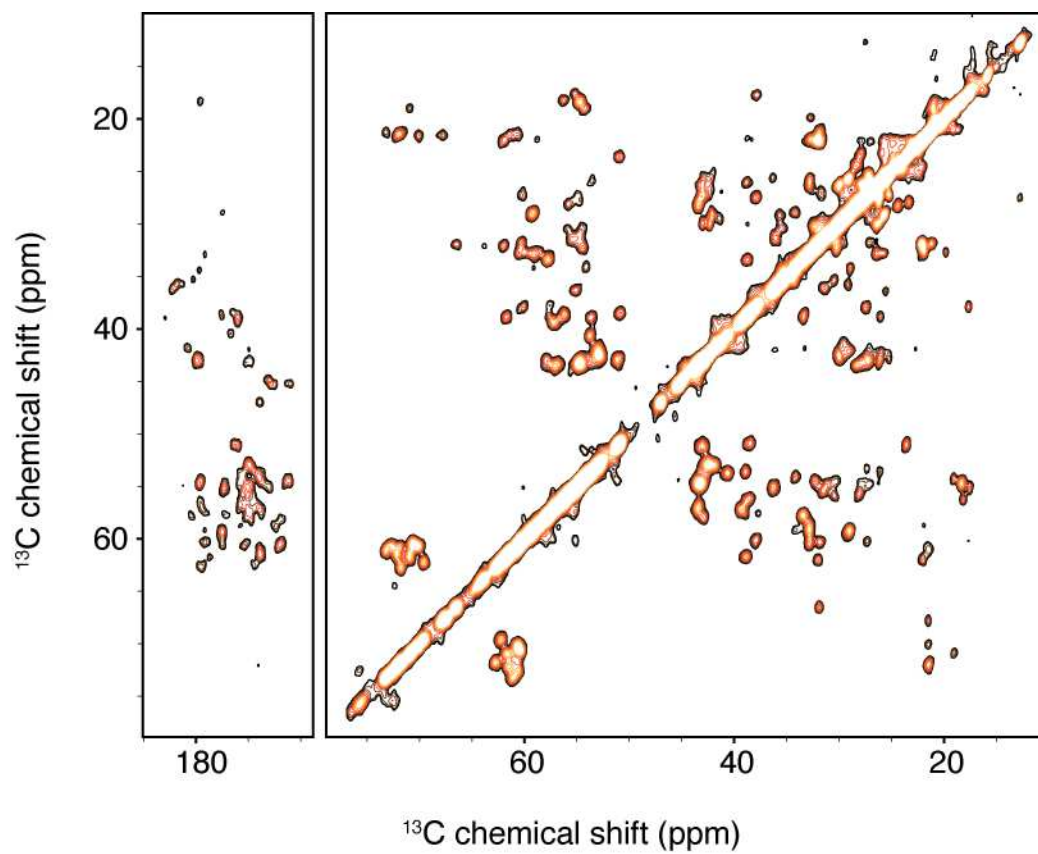

**Figure S13.** 2D  $^{13}\text{C}$ - $^{13}\text{C}$  PAR correlation spectra on  $[\text{U-}^{13}\text{C}, ^{15}\text{N}]$ -GB1 obtained at  $\omega_r/2 = 65$  kHz and  $\omega_{\text{OH}}/2 = 500$  MHz. The PAR mixing time was 2.5 ms and used  $\sim 19.5$  kHz  $^{13}\text{C}$  and  $\sim 72.8$  kHz  $^1\text{H}$  irradiation. 16.5 kHz low power TPPM decoupling was employed during the acquisition and  $t_1$  evolution.

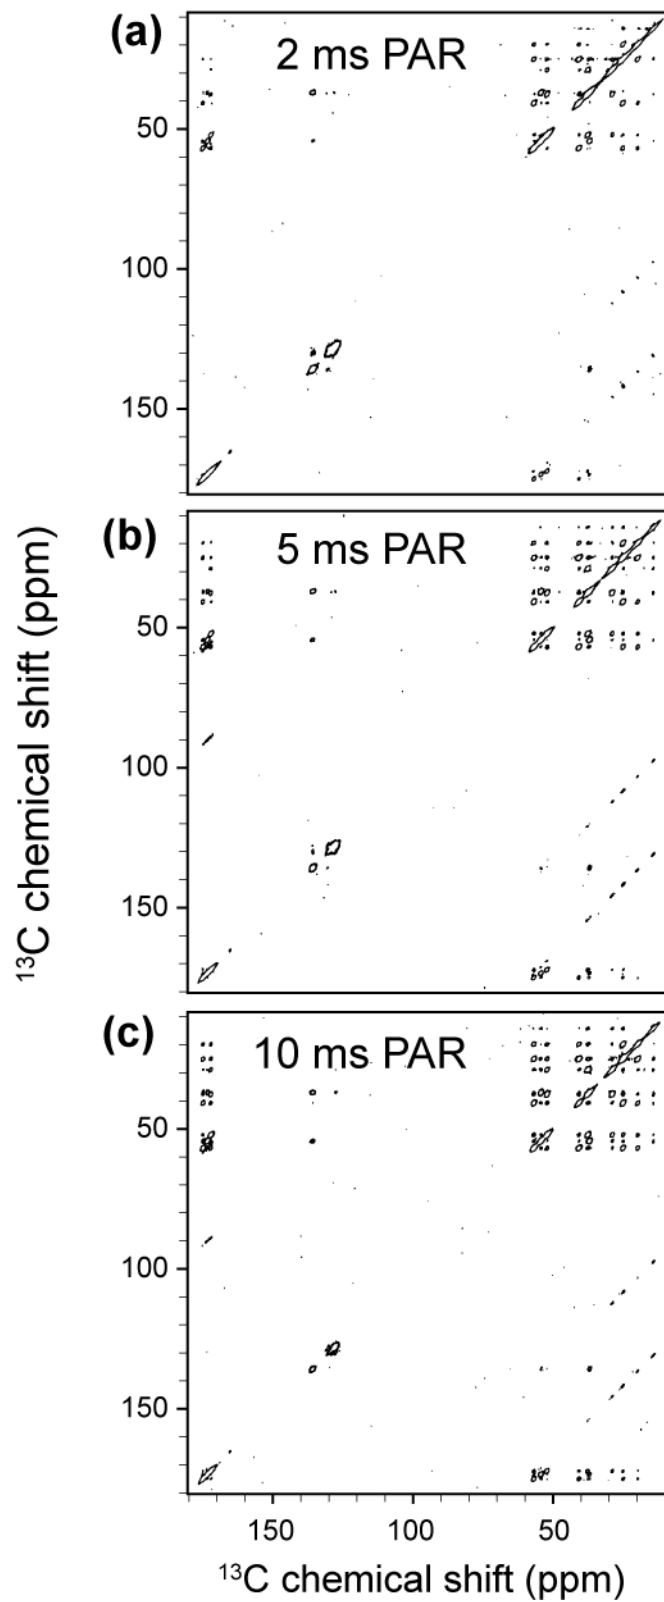

**Figure S14.** 2D  $^{13}\text{C}$ - $^{13}\text{C}$  PAR correlation spectra on  $[\text{U-}^{13}\text{C},^{15}\text{N}]$ -*f*-MLF-OH obtained at  $\omega_r/2 = 65$  kHz and  $\omega_{0H}/2 = 500$  MHz. The PAR mixing time was (a) 2 ms, (b) 5 ms, (c) 10 ms and used  $\sim 110$  kHz  $^{13}\text{C}$  and  $\sim 85$  kHz  $^1\text{H}$  irradiation. 230 kHz XiX decoupling (the XiX pulse was  $60.2 \mu\text{s}$  i.e.  $3.91 \tau_r$ ) was employed during the acquisition and  $t_1$  evolution.

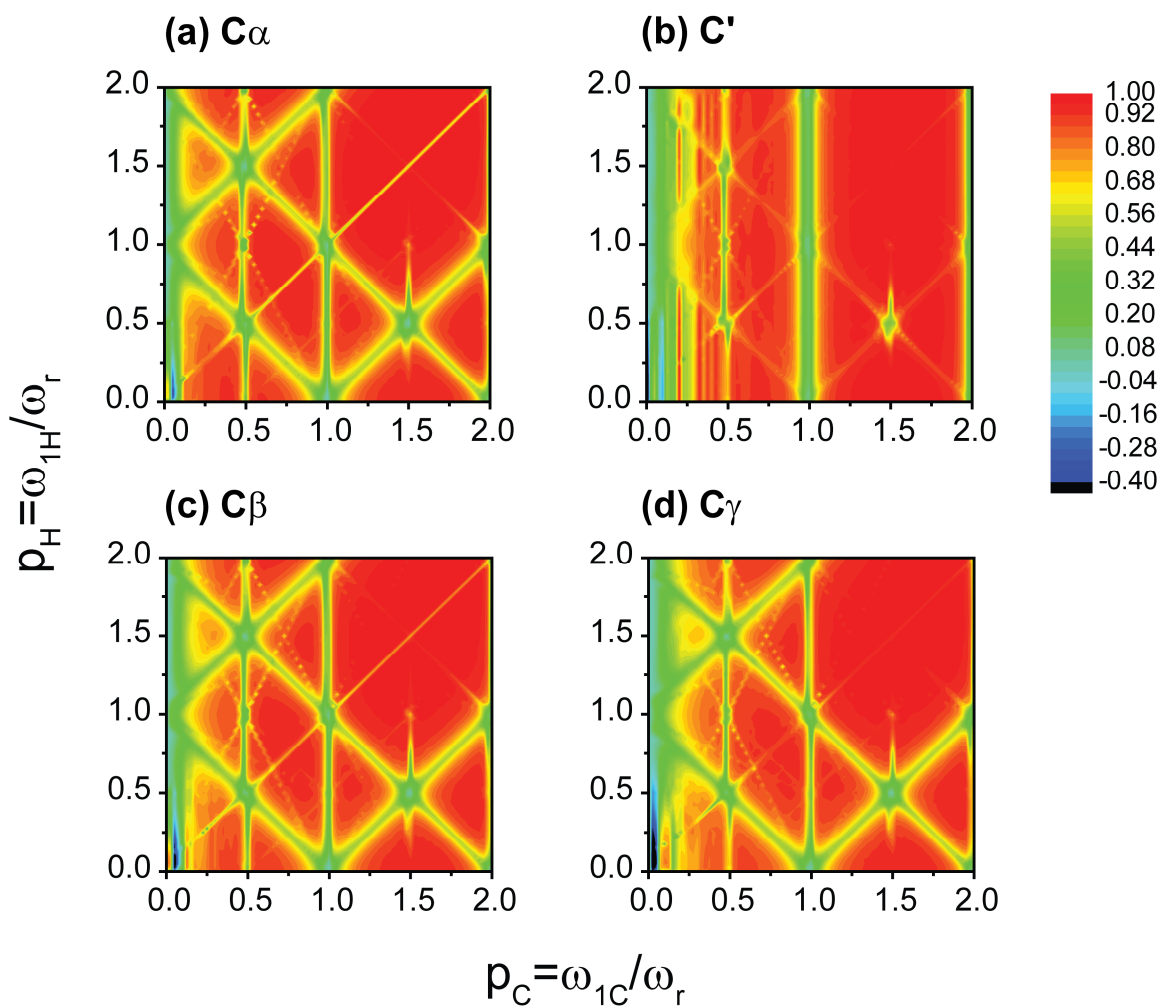

**Figure S15.** Simulated “interference” map on the spin system described in Table SII. In the interference map the decay of the magnetization on the carbons after the PAR mixing is monitored as a function of carbon ( $p_C$ ) and proton ( $p_H$ ) irradiation in units of spinning frequency. The initial magnetization is prepared on the x-axis on all the carbons. The settings for the simulation are identical to the settings used in Fig. SII. The comparison between the interference maps and the polarization transfer map shown in Fig. 2 and Fig. SII allows one to choose the appropriate rf settings for performing PAR experiments. Note that the destructive interference features are roughly the same for the PAR polarization transfer maps and the “interference” maps (Hartmann-Hahn and Rotary Resonance conditions). These common features are used to calibrate the rf field strength and to optimize the PAR settings. It is important to keep in mind that the “interference” map is used solely for the calibration of relative  $^{13}\text{C}$  and  $^1\text{H}$  rf powers and that settings yielding high intensities in the “interference” maps do not necessarily yield efficient PAR polarization transfer.

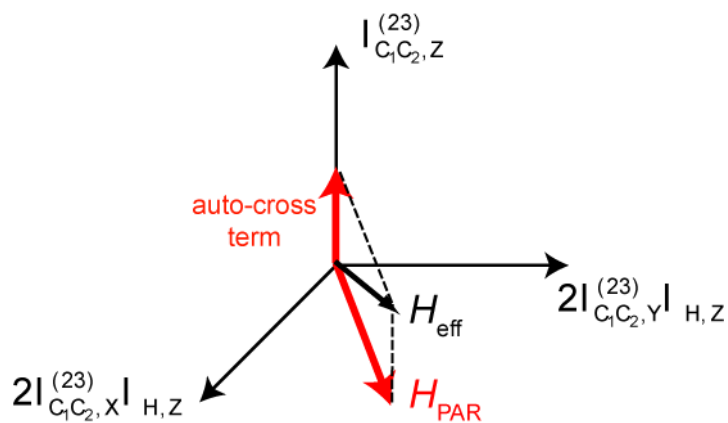

**Figure S16.** Visualization of PAR spin dynamics subspace. The space can be seen as a coupled basis between a fictitious ZQ operator involving the two carbons and a proton spin. The red arrows indicate PAR recoupling axis and longitudinal tilting field resulting from auto-cross terms.

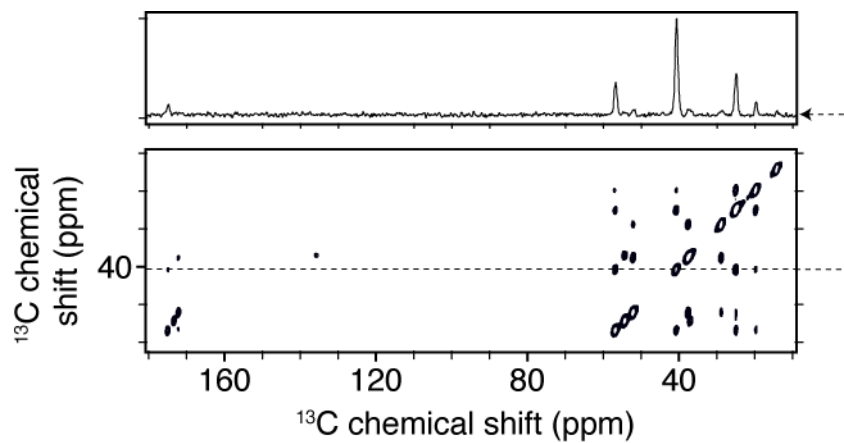

**Figure S17.** Short  $^{13}\text{C}$ - $^{13}\text{C}$  PAR 2D spectrum of  $[\text{U-}^{13}\text{C}, ^{15}\text{N}]\text{-f-MLF-OH}$  obtained in ~52 minutes at  $\omega_r/2\pi = 65$  kHz and  $\omega_{\text{OH}}/2\pi = 500$  MHz. The top panel shows a representative 1D slice to illustrate the overall SNR. The PAR mixing time was set to 5 ms and the rf field strength were respectively ~110 kHz for the  $^{13}\text{C}$  irradiation and ~85 kHz for the  $^1\text{H}$  irradiation. 230 kHz XiX decoupling was employed during the acquisition and  $t_1$  evolution (the XiX pulse was set 60.2  $\mu\text{s}$  i.e. 3.91  $\tau_r$ ). The spectral width in the indirect dimension was 25.1 kHz.

## SPINEVOLUTION File for generating PAR polarization transfer maps.

Example of a SPINEVOLUTION input file for simulating PAR polarization transfer (the contents of the input file are in Courier pt. 9 font):

```
***** The System *****
spectrometer(MHz) 500
spinning_freq(kHz) 60
channels C13 H1
nuclei C13 C13 C13 H1 H1
atomic_coords CO-Ca-Ha-Cb-Hb.cor
cs_isotropic -65 65 75 0 0 ppm
csa_parameters 1 -76 0.9 90 90 0 ppm
csa_parameters 2 -20 0.5 99.4 146.0 138.9 ppm
csa_parameters 3 -22 0.7 0 14.0 38.9 ppm
csa_parameters 4 5.7 0.65 90 -90 90 ppm
csa_parameters 5 5.7 0.65 90 -90 90 ppm
j_coupling *
quadrupole *
dip_switchboard *
csa_switchboard *
exchange_nuclei *
bond_len_nuclei *
bond_ang_nuclei *
tors_ang_nuclei *
groups_nuclei *
***** Pulse Sequence *****
CHN 1
timing(usec) (100)40D0
power(kHz) 50
phase(deg) 0
freq_offs(kHz) 0
CHN 2
timing(usec) (100)
power(kHz) 50
phase(deg) 0
freq_offs(kHz) 0
***** Variables *****
*edit the spinning frequency in the next line
spinning_freq=20

*select the grid parameters: pc - 13C power, ph - 1H power
scan_par pc/0:0.1:5/ ph/0:0.1:5/

*the carbon and proton power levels are scanned from 0 to 5*spinning_freq=100kHz in steps of
0.1*spinning_freq=0.1*20=2kHz

power_1_1_1=pc*spinning_freq
power_2_1_1=ph*spinning_freq
***** Options *****
rho0 I1x
observables I1x I2x I3x
EulerAngles rep168
n_gamma 10
line_broaden(Hz) *
zerofill *
FFT_dimensions *
options -v1 -re
```

In this example the mixing time is  $100 \times 40 \text{ ms} = 4 \text{ ms}$ . The initial magnetization is prepared on the C' and observed on all three carbon. The CSA values are generic - you can update them according to your system.

The nuclear coordinates can be placed in a separate file, here *CO-Ca-Ha-Cb-Hb.cor*. An example of *CO-Ca-Ha-Cb-Hb.cor* would look as follows (the contents of the file are in Courier pt. 9 font):

```
-0.272 1.663 0.264 LC
0.288 0.451 0.987 LCA
1.822 0.465 0.933 LCB
-0.042 0.456 2.016 LHA
2.171 1.360 1.431 L2HB
```



## **References**

- (1) Rienstra, C. M.; Tucker-Kellogg, L.; Jaroniec, C. P.; Hohwy, M.; Reif, B.; McMahon, M. T.; Tidor, B.; Lozano-Perez, T.; Griffin, R. G. *Proceedings of the National Academy of Sciences of the United States of America* **2002**, *99*, 10260-10265.
